# Supplementary material for: Partial Disruption of Translational and Posttranslational Machinery Reshapes Growth Rates of Bartonella birtlesii
Source: PubMed Central journal article supplement — mBio. 2013 Apr 23;4(2):e00115-13. doi: 10.1128/mBio.00115-13 (PMC3638310; doi:10.1128/mbio.00115-13), 2013-04-23
Supplement: mbo002131503sf02.pdf [file mbo002131503sf02.pdf]

Figure S2

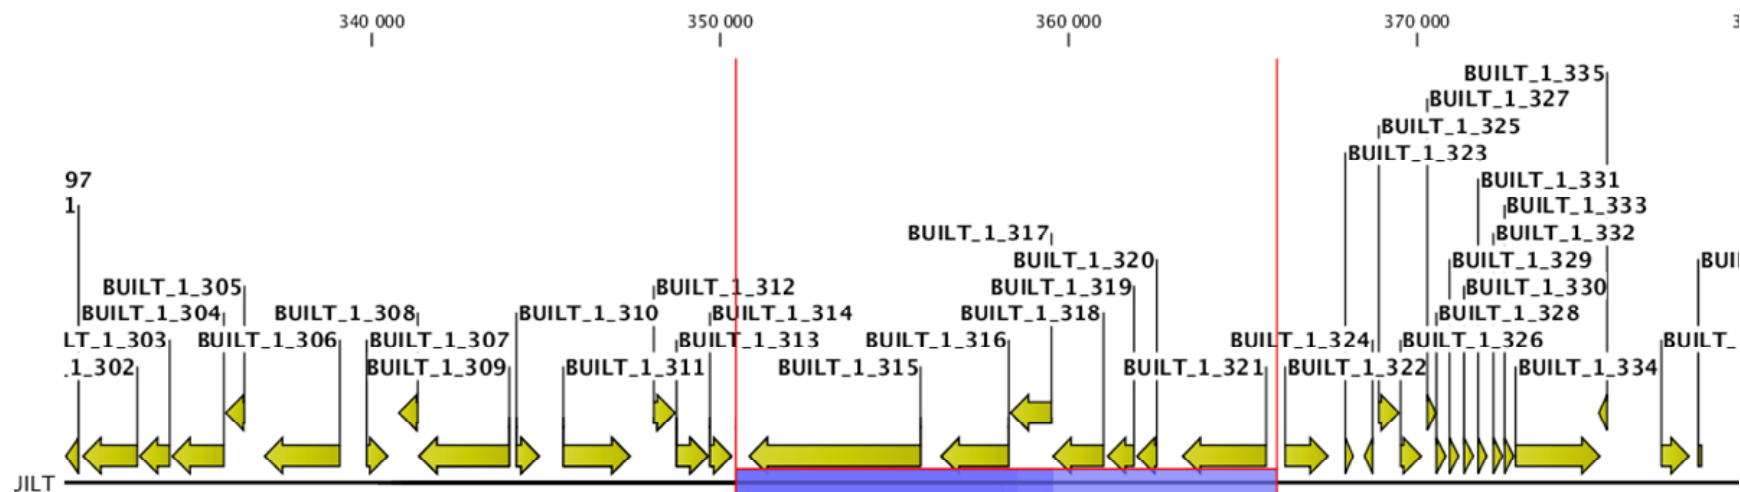

315: helicase/methyltransferase

316: ATP-binding protein of ABC transporter (peut etre macrolide efflux)

317: putative secretion protein

318: outer membrane efflux protein

319: exodeoxyribonuclease III

320: Outer membrane lipoprotein carrier protein

321: cell division protein FtsK
