# Supplementary figures and images for: Partial Disruption of Translational and Posttranslational Machinery Reshapes Growth Rates of Bartonella birtlesii
Source: PubMed Central journal article supplement — mBio. 2013 Apr 23;4(2):e00115-13. doi: 10.1128/mBio.00115-13 (PMC3638310; doi:10.1128/mbio.00115-13), 2013-04-23

Figure S1

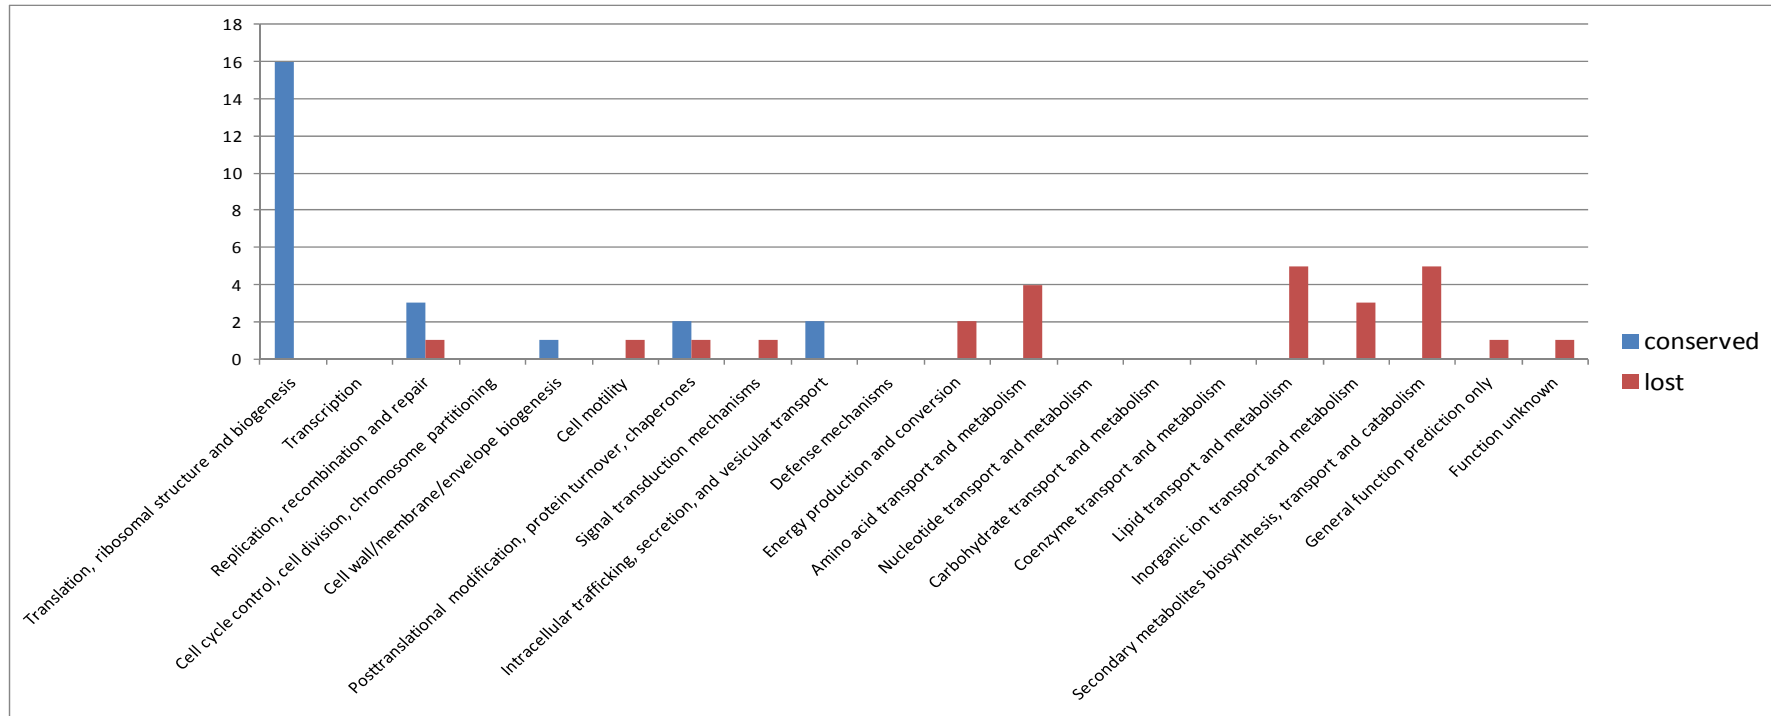

Supplement: mbo002131503sf01.pdf [file mbo002131503sf01.pdf]
